# Supplementary material for: Evolution and expression analyses of the MADS-box gene family in Brassica napus
Source: PubMed Central journal article supplement (PMC6053192; doi:10.1371/journal.pone.0200762), 2018-07-19
Supplement: pone.0200762.s002.pdf [file pone.0200762.s002.pdf]

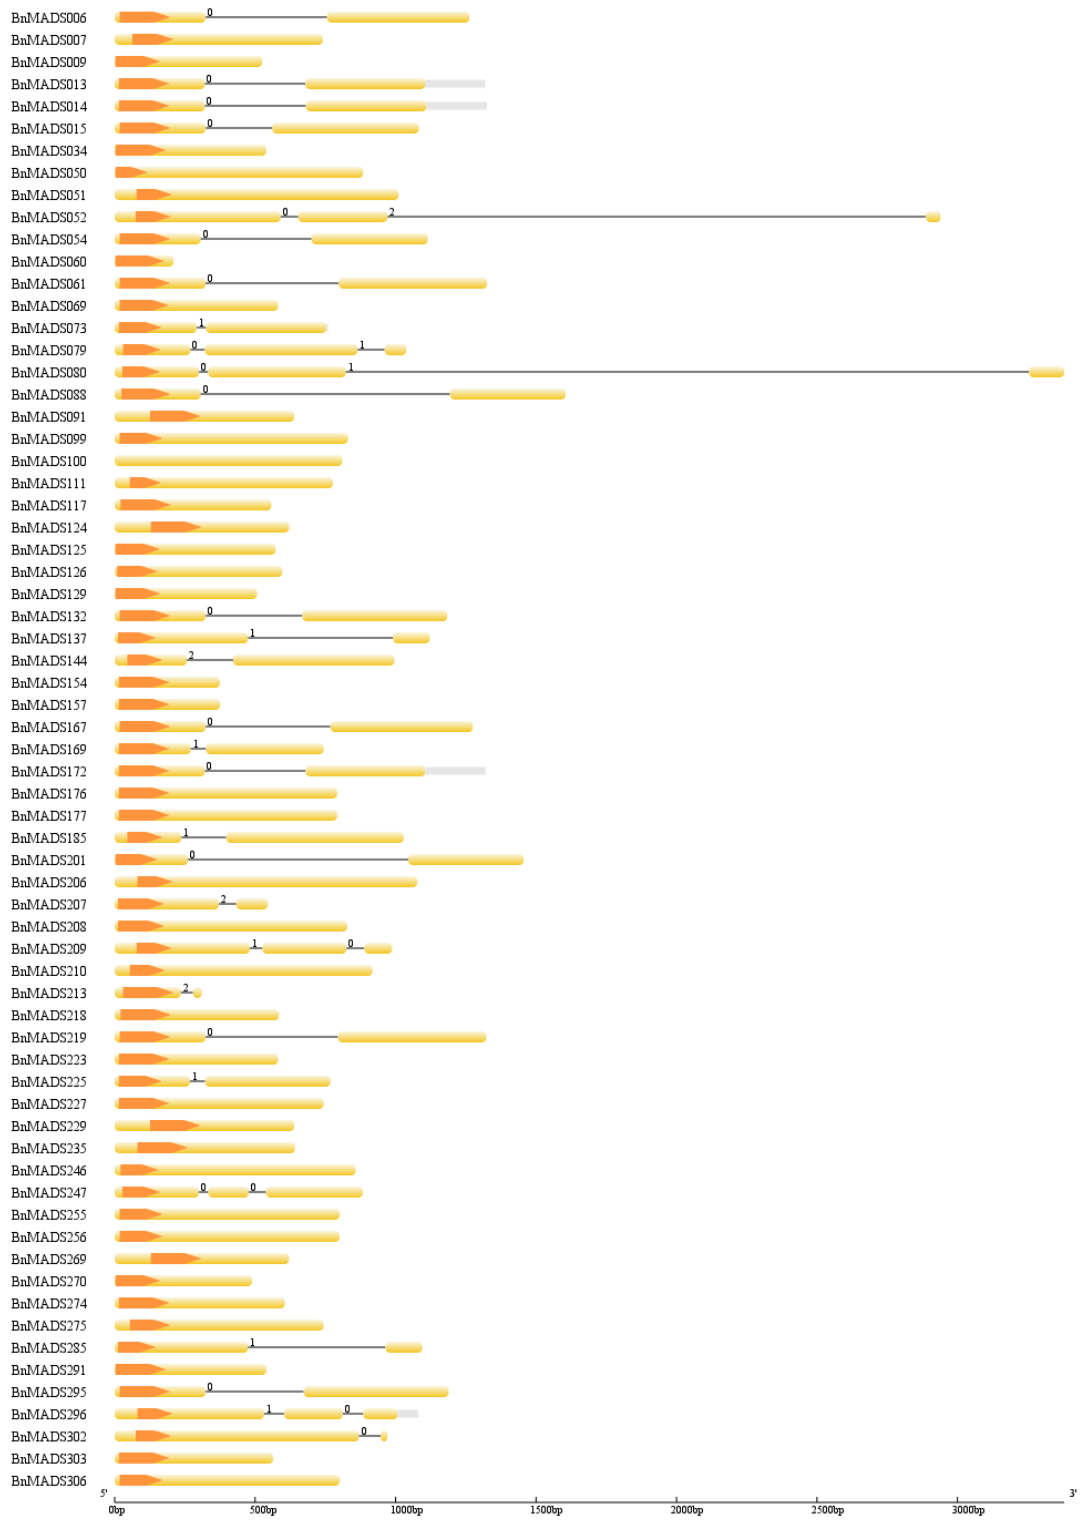

(A)

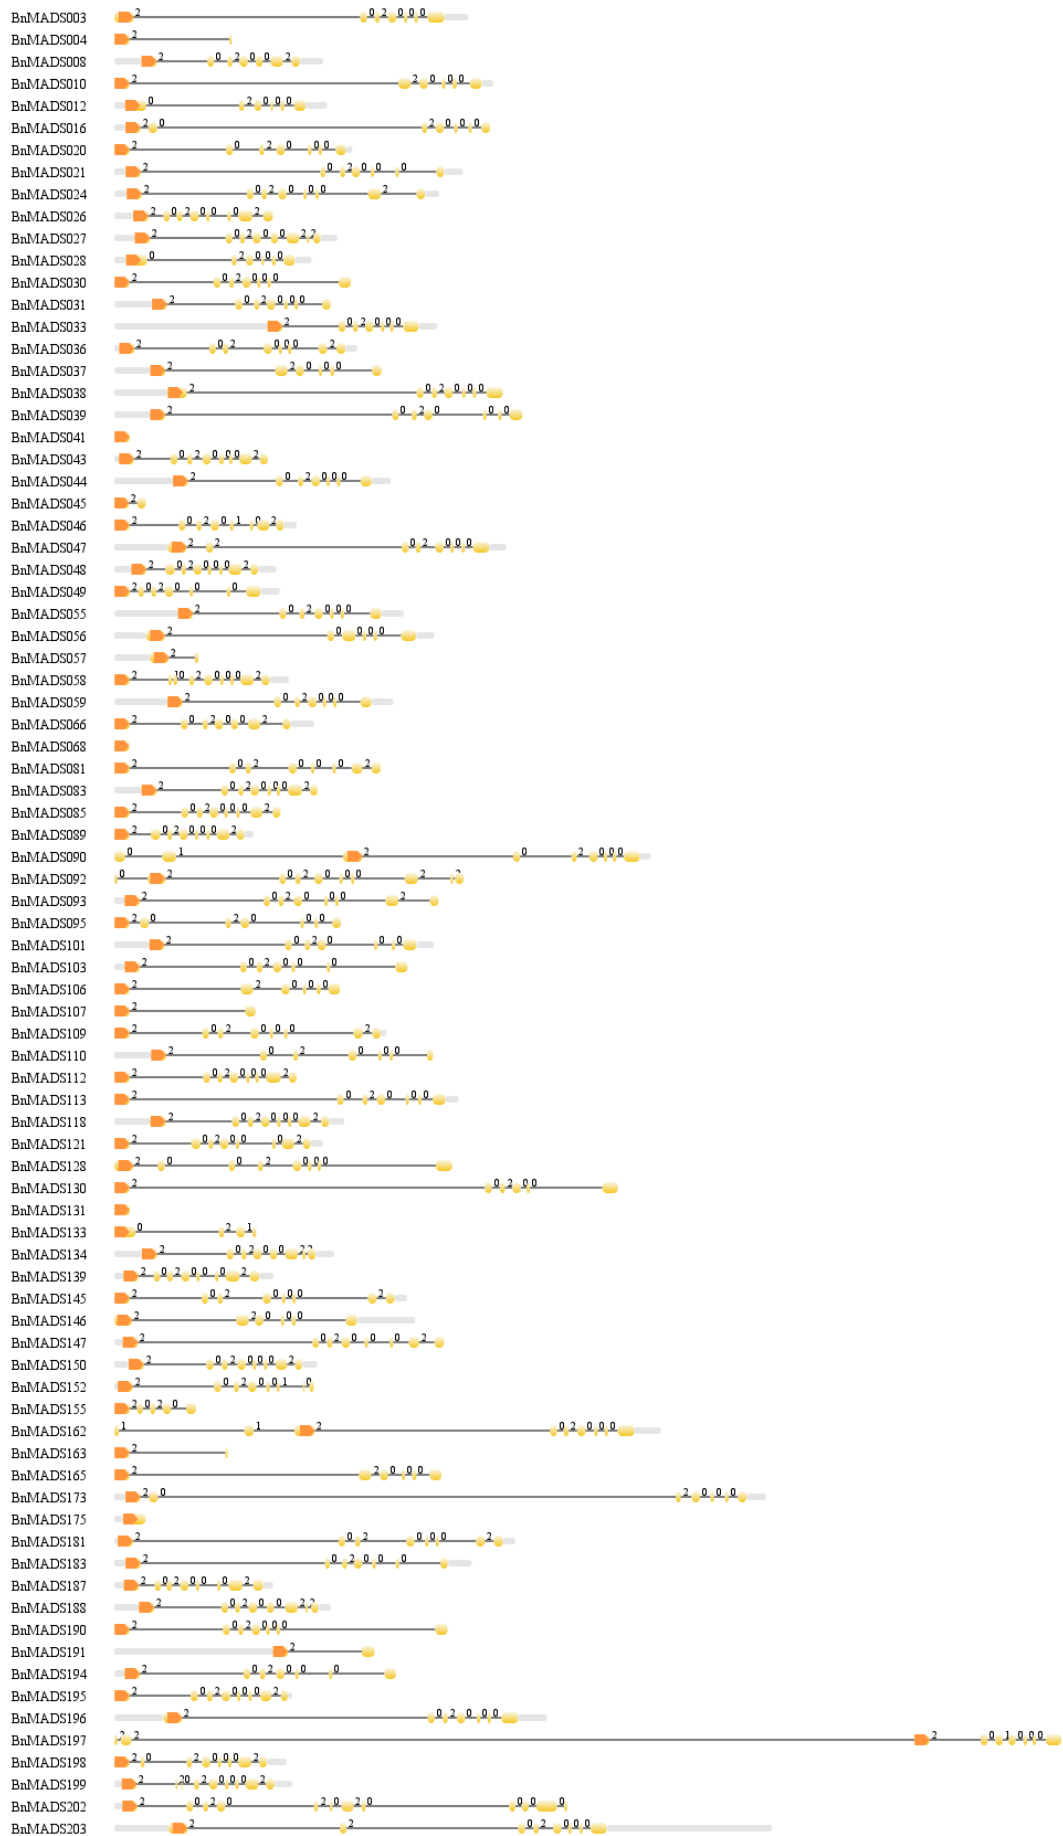

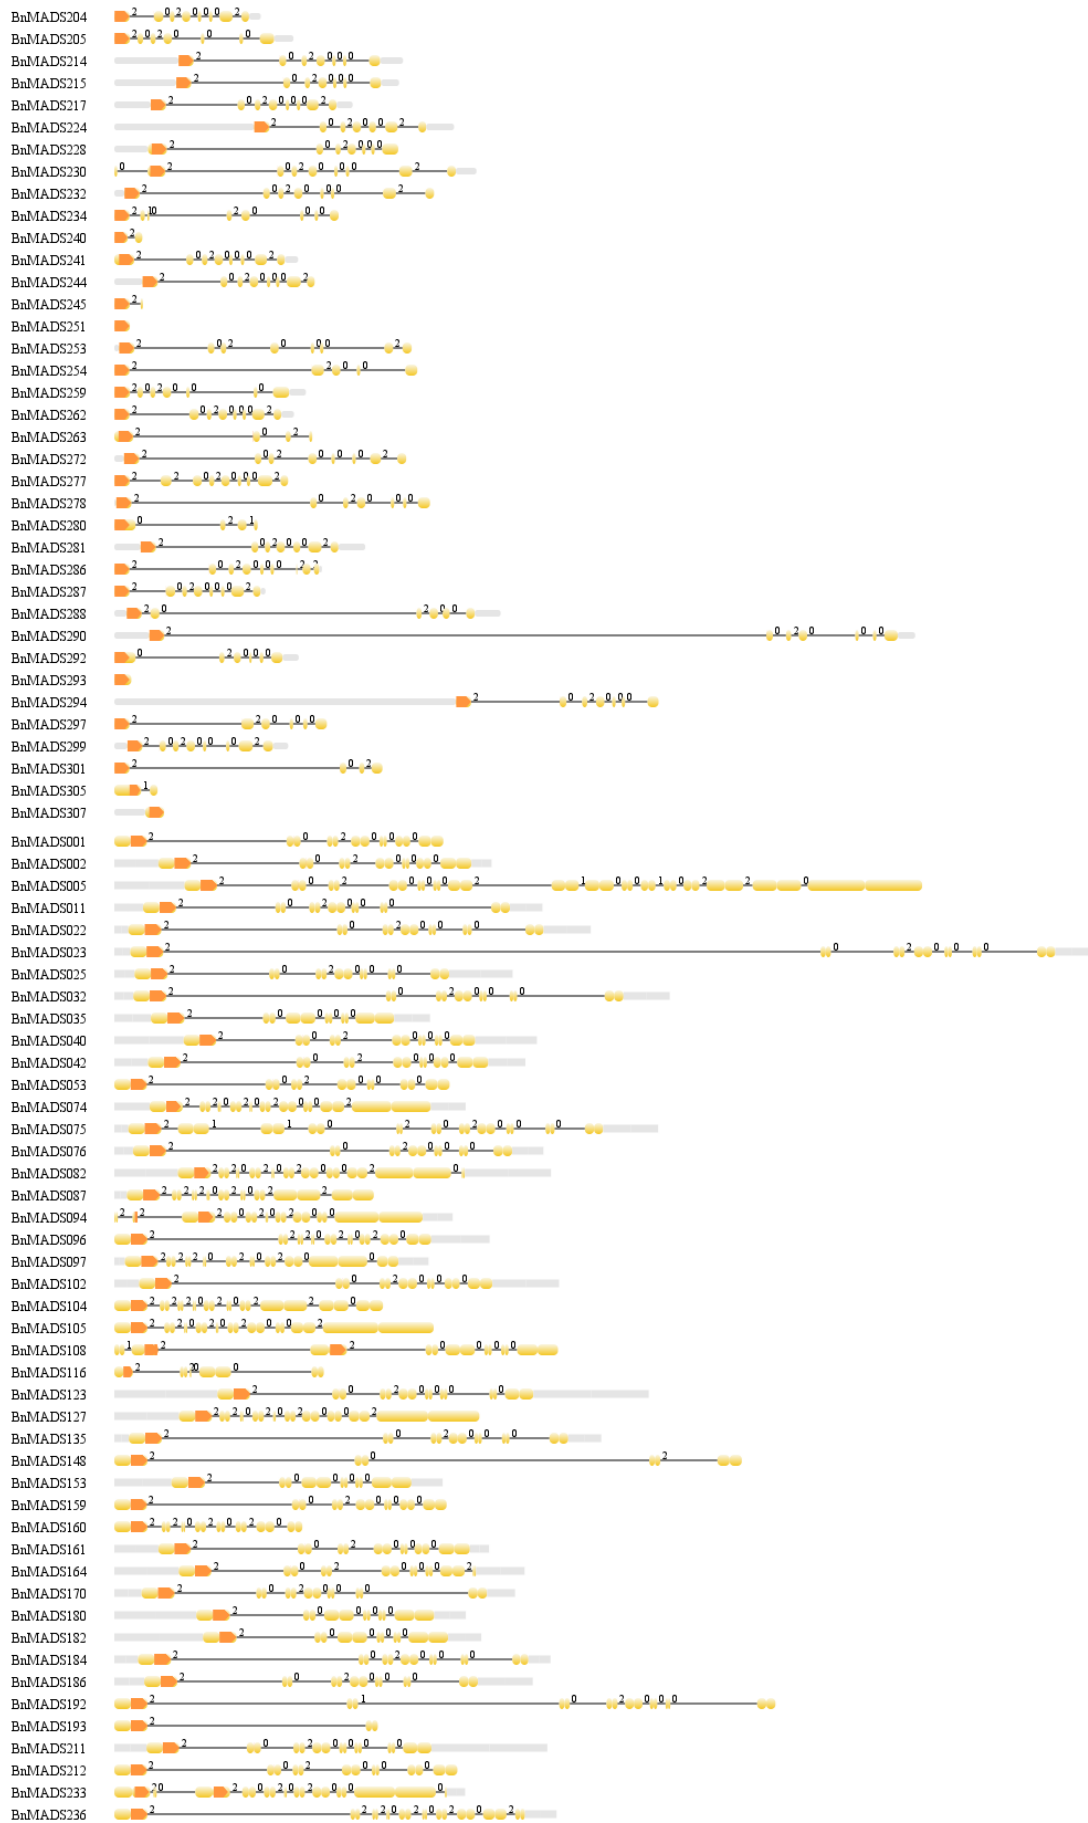

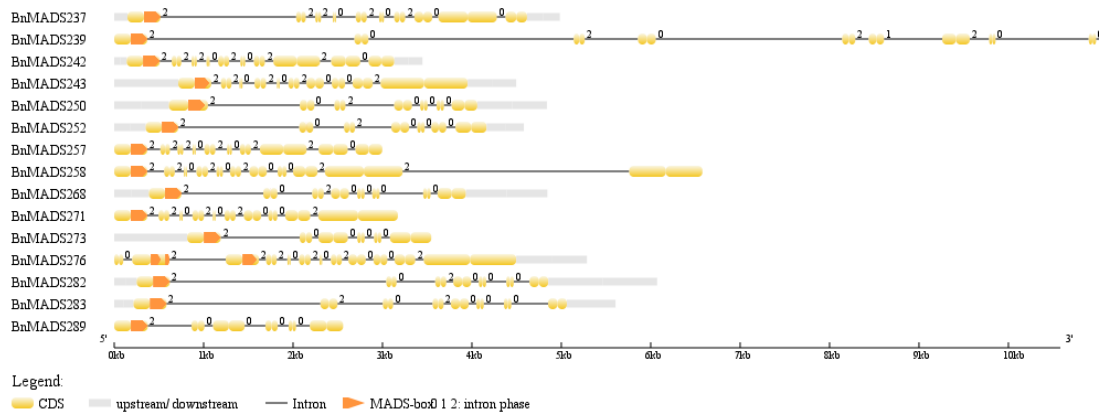

(B)

**S2 Fig. Structures of the *BnMADSs* in *B. napus*.** Exon(s) are indicated by yellow boxes, MADS-box domain(s) by orange boxes, untranslated region(s) by grey boxes, and spaces between the coloured boxes correspond to introns. Exon and intron size can be estimated using the horizontal scale bar. (A): the structures of type I *BnMADSs*; (B): the structures of type II *BnMADSs*.
