# Supplementary material for: Evolution and expression analyses of the MADS-box gene family in Brassica napus
Source: PLoS One. 2018 Jul 19;13(7):e0200762. doi: 10.1371/journal.pone.0200762 (PMC6053192; doi:10.1371/journal.pone.0200762)
Supplement: S3 Table — (XLSX) [file pone.0200762.s006.xlsx]

## Sheet: Sheet 1
S3 Table. Duplications of MADS-box genes in B. napus, B. rapa, and B. oleracea.
Synteny relationship across B. napus, B. rape and B. ol						Segemental duplication (SD) in B. napus			Tandem duplication in B. napus		Homologous exchange (HE) in B. napus			Segmental Exchange (SE) in B. napus
Name	B. napus	B. rapa	Cho	B. ol	Cho	Number of SD pairs	Name 1	Name 2	Name 1	Name 2	Number of HE pairs	Name 1	Name 2	Name
BnMADS025	BnaA03g02820D	Brara.J02336.1.v1.3	A10	Bol043693	C09	a	BnMADS025	BnMADS186	BnMADS056	BnMADS057	1	BnMADS178	BnMADS019	BnMADS236
BnMADS011	BnaA02g00370D	Brara.F02378.1.v1.3	A06	Bol008027	C02	b	BnMADS040	BnMADS005	BnMADS198	BnMADS199	2	BnMADS179	BnMADS018	BnMADS236
BnMADS075	BnaA06g23990D	Brara.B03931.1.v1.3	A02	Bol008758	C03	c	BnMADS123	BnMADS211	BnMADS264	BnMADS265	3	BnMADS212	BnMADS053	BnMADS229
BnMADS096	BnaA07g33810D	Brara.G03542.1.v1.3	A07	Bol027523	C07	d	BnMADS209	BnMADS052			4	BnMADS257	BnMADS104	BnMADS235
BnMADS135	BnaA10g22080D	Brara.G01050.1.v1.3	A07			e	BnMADS216	BnMADS119			5	BnMADS167	BnMADS006	BnMADS181
BnMADS170	BnaC02g00490D	Brara.H02250.1.v1.3	A08			f	BnMADS217	BnMADS118			6	BnMADS223	BnMADS069	BnMADS253
BnMADS193	BnaC03g49240D					g	BnMADS219	BnMADS167			7	BnMADS205	BnMADS049	BnMADS250
BnMADS186	BnaC03g04170D					h	BnMADS220	BnMADS062			8	BnMADS274	BnMADS125	BnMADS211
BnMADS236	BnaC06g38450D					i	BnMADS222	BnMADS064						BnMADS254
BnMADS283	BnaC09g46540D					j	BnMADS224	BnMADS134						BnMADS213
						k	BnMADS225	BnMADS073
BnMADS008	BnaA01g33070D	Brara.E03583.1.v1.3	A05	Bol034367	C03	l	BnMADS226	BnMADS072
BnMADS027	BnaA03g05650D	Brara.A03887.1.v1.3	A01	Bol030482	C09	m	BnMADS228	BnMADS090
BnMADS066	BnaA05g33600D	Brara.C00694.1.v1.3	A03	Bol016009	C06	n	BnMADS234	BnMADS095
BnMADS188	BnaC03g07350D	Brara.J01932.1.v1.3	A10			o	BnMADS246	BnMADS080
BnMADS224	BnaC05g48320D	Brara.I00679.1.v1.3	A09			p	BnMADS247	BnMADS079
		Brara.B03396.1.v1.3	A02			q	BnMADS249	BnMADS077
		Brara.I00352.1.v1.3	A10			r	BnMADS285	BnMADS137
BnMADS130	BnaA10g07680D	Brara.I00679.1.v1.3	A09	Bol039528	C01
BnMADS030	BnaA03g12970D	Brara.J00749.1.v1.3	A10	Bol028071	C03
BnMADS106	BnaA08g30890D	Brara.A01539.1.v1.3	A01	Bol042238	C07
BnMADS110	BnaA09g05900D	Brara.C01460.1.v1.3	A03	Bol029409	C09
BnMADS165	BnaC01g17400D	Brara.F02136.1.v1.3	A06
BnMADS190	BnaC03g15810D	Brara.H01578.1.v1.3	A08
		Brara.K00198.1.v1.3	Scaffold10985
		Brara.B03794.1.v1.3	A02
BnMADS059	BnaA05g05010D	Brara.E00520.1.v1.3	A05	Bol029555	C03
BnMADS044	BnaA03g56880D	Brara.C02303.1.v1.3	A03	Bol030200	C04
BnMADS046	BnaA04g00890D	Brara.D02757.1.v1.3	A04	Bol021742	C04
BnMADS198	BnaC04g04380D	Brara.D00124.1.v1.3	A04	Bol030199	C04
BnMADS202	BnaC04g21960D	Brara.D02761.1.v1.3	A04	Bol021746	C04
		Brara.G01906.1.v1.3	A07
BnMADS249	BnaC07g28670D	Brara.B03579.1.v1.3	A02	Bol022282	C06
BnMADS019	BnaA02g31760D	Brara.F02807.1.v1.3	A06
BnMADS018	BnaA02g31510D	Brara.B03611.1.v1.3	A02
BnMADS064	BnaA05g31430D	Brara.A03689.1.v1.3	A01
BnMADS077	BnaA06g28220D	Brara.E03334.1.v1.3	A05
BnMADS143	BnaAnng02950D
BnMADS178	BnaC02g40080D
BnMADS179	BnaC02g40410D
BnMADS222	BnaC05g45960D
BnMADS107	BnaA09g02740D	Brara.B03396.1.v1.3	A02	Bol032290	C09
BnMADS081	BnaA06g30700D	Brara.G02850.1.v1.3	A07	Bol033137	C02
BnMADS093	BnaA07g27710D	Brara.H02134.1.v1.3	A08	Bol043045	C06
BnMADS092	BnaA07g24360D	Brara.F03067.1.v1.3	A06	Bol023961	C07
BnMADS103	BnaA08g19710D	Brara.G02489.1.v1.3	A07	Bol028615	C02
BnMADS147	BnaAnng07800D	Brara.I00352.1.v1.3	A09	Bol017332	C07
BnMADS272	BnaC09g02190D	Brara.B01837.1.v1.3	A02	Bol024957	C03
		Brara.B03164.1.v1.3	A02
		Brara.F03360.1.v1.3	A06
BnMADS195	BnaC03g57540D	Brara.H02064.1.v1.3	A08	Bol016009	C06
BnMADS085	BnaA07g08950D	Brara.H02134.1.v1.3	A08	Bol041762	C06
BnMADS103	BnaA08g19710D	Brara.G00861.1.v1.3	A07	Bol024957	C03
BnMADS118	BnaA09g28040D	Brara.I03027.1.v1.3	A09	Bol032290	C09
BnMADS150	BnaAnng21750D	Brara.B01837.1.v1.3	A02	Bol017332	C07
BnMADS148	BnaAnng09810D	Brara.G02850.1.v1.3	A07	Bol023961	C07
BnMADS217	BnaC05g21200D	Brara.F03360.1.v1.3	A06
BnMADS241	BnaC07g11300D	Brara.G02489.1.v1.3	A07
BnMADS159	BnaC01g01080D	Brara.D01347.1.v1.3	A04	Bol028877	C01
BnMADS001	BnaA01g00160D	Brara.A00107.1.v1.3	A01	Bol032745	C03
BnMADS053	BnaA04g13050D	Brara.H01746.1.v1.3	A08	Bol044741	C08
BnMADS102	BnaA08g15900D	Brara.I04572.1.v1.3	A09
BnMADS123	BnaA09g42480D
BnMADS212	BnaC04g35150D
BnMADS257	BnaC08g05830D	Brara.F02378.1.v1.3	A06	Bol043693	C09
BnMADS087	BnaA07g10680D	Brara.J02336.1.v1.3	A10	Bol027523	C07
BnMADS096	BnaA07g33810D	Brara.B03931.1.v1.3	A02	Bol008758	C03
BnMADS104	BnaA08g20930D	Brara.G03542.1.v1.3	A07	Bol008027	C02
BnMADS242	BnaC07g14030D	Brara.G01050.1.v1.3	A07
BnMADS236	BnaC06g38450D	Brara.H02250.1.v1.3	A08
BnMADS244	BnaC07g22490D	Brara.B01837.1.v1.3	A02	Bol028615	C02
BnMADS083	BnaA06g39810D	Brara.B03396.1.v1.3	A02	Bol032290	C09
BnMADS112	BnaA09g19420D	Brara.H02134.1.v1.3	A08	Bol017332	C07
BnMADS277	BnaC09g22090D	Brara.B03164.1.v1.3	A02	Bol024957	C03
BnMADS093	BnaA07g27710D	Brara.F03360.1.v1.3	A06	Bol023961	C07
		Brara.F03067.1.v1.3	A06	Bol043045	C06
		Brara.G02850.1.v1.3	A07
		Brara.G02489.1.v1.3	A07
		Brara.I00352.1.v1.3	A09
BnMADS228	BnaC06g16910D	Brara.D00221.1.v1.3	A04	Bol004959	C04
BnMADS047	BnaA04g01810D	Brara.E00310.1.v1.3	A05	Bol023763	C07
BnMADS090	BnaA07g18050D	Brara.G01817.1.v1.3	A07
BnMADS128	BnaA09g55330D	Brara.I04053.1.v1.3	A09
BnMADS203	BnaC04g23360D
BnMADS263	BnaC08g29520D
BnMADS027	BnaA03g05650D	Brara.E03583.1.v1.3	A05	Bol034367	C03
BnMADS066	BnaA05g33600D	Brara.C00694.1.v1.3	A03	Bol030482	C09
BnMADS188	BnaC03g07350D	Brara.J01932.1.v1.3	A10	Bol016009	C06
BnMADS224	BnaC05g48320D	Brara.A03887.1.v1.3	A01
BnMADS134	BnaA10g18480D	Brara.I00679.1.v1.3	A09
BnMADS281	BnaC09g42060D	Brara.B03396.1.v1.3	A02
		Brara.I00352.1.v1.3	A09
BnMADS048	BnaA04g02430D	Brara.D00288.1.v1.3	A04	Bol011058	C04
BnMADS089	BnaA07g17280D	Brara.G01735.1.v1.3	A07	Bol007579	C07
BnMADS121	BnaA09g36710D	Brara.I03965.1.v1.3	A09	Bol045494	C08
BnMADS204	BnaC04g24260D
BnMADS262	BnaC08g28320D
BnMADS287	BnaCnng07450D
BnMADS243	BnaC07g22060D	Brara.F03392.1.v1.3	A06	Bol015185	C02
BnMADS082	BnaA06g33870D	Brara.G02888.1.v1.3	A07	Bol023922	C07
BnMADS094	BnaA07g28090D	Brara.I02072.1.v1.3	A09	Bol007215	C06
BnMADS233	BnaC06g30770D			Bol032513	C09
BnMADS276	BnaC09g21150D			Bol028566	C02
BnMADS038	BnaA03g43820D	Brara.A01004.1.v1.3	A01	Bol009360	C01
BnMADS003	BnaA01g09760D	Brara.K01743.1.v1.3		Bol029887	C03
BnMADS162	BnaC01g11460D			Bol024398	C06
BnMADS196	BnaC03g62970D
BnMADS091	BnaA07g23100D	Brara.G02360.1.v1.3	A07	Bol040070	C07
BnMADS124	BnaA09g45020D	Brara.G03122.1.v1.3	A07	Bol026349	C07
BnMADS229	BnaC06g24370D	Brara.I04835.1.v1.3	A09	Bol009782	C08
BnMADS235	BnaC06g33560D
BnMADS007	BnaA01g26610D	Brara.A02918.1.v1.3	A01	Bol030956	C01
BnMADS062	BnaA05g21510D	Brara.E02331.1.v1.3	A05	Bol022881	C03
BnMADS168	BnaC01g34010D
BnMADS220	BnaC05g34470D
BnMADS284	BnaC09g49060D	Brara.B00210.1.v1.3	A02	Bol024509	C02
BnMADS136	BnaA10g24480D	Brara.J02573.1.v1.3	A10	Bol043940	C09
BnMADS142	BnaAnng01720D	Brara.J02594.1.v1.3	A10	Bol043965	C09
BnMADS171	BnaC02g01970D
BnMADS182	BnaC02g42240D	Brara.B03768.1.v1.3	A02	Bol017090	C06
BnMADS037	BnaA03g40220D	Brara.I00628.1.v1.3	A09	Bol036252	C09
BnMADS108	BnaA09g05410D	Brara.A01539.1.v1.3	A01	Bol039528	C01
BnMADS146	BnaAnng06990D	Brara.C04259.1.v1.3	A03	Bol017012	C06
BnMADS273	BnaC09g04950D	Brara.B03724.1.v1.3	A02	Bol024572	C02
		Brara.C04181.1.v1.3	A03	Bol020634	C03
		Brara.C00336.1.v1.3	A03	Bol008824	C03
		Brara.I00679.1.v1.3	A09
BnMADS133	BnaA10g15180D	Brara.C00925.1.v1.3	A03	Bol036154	C02
BnMADS012	BnaA02g04770D	Brara.J01588.1.v1.3	A10	Bol034595	C03
BnMADS028	BnaA03g08030D			Bol035836	C09
BnMADS280	BnaC09g37550D
BnMADS292	BnaCnng36180D
BnMADS074	BnaA06g12900D	Brara.F01317.1.v1.3	A06	Bol030741	C05
BnMADS105	BnaA08g22460D	Brara.H02405.1.v1.3	A08	Bol013192	C08
BnMADS258	BnaC08g18290D	Brara.I04768.1.v1.3	A09	Bol044849	C08
BnMADS095	BnaA07g29450D	Brara.B01958.1.v1.3	A02	Bol034952	C02
BnMADS016	BnaA02g15390D	Brara.G03058.1.v1.3	A07	Bol026349	C07
BnMADS173	BnaC02g20640D	Brara.G02398.1.v1.3	A07
BnMADS234	BnaC06g32640D
BnMADS288	BnaCnng07880D
BnMADS055	BnaA04g26320D	Brara.C02303.1.v1.3	A03	Bol029555	C03
BnMADS214	BnaC04g50370D	Brara.D02757.1.v1.3	A04	Bol021742	C04
BnMADS044	BnaA03g56880D	Brara.E00520.1.v1.3	A05	Bol030200	C04
BnMADS198	BnaC04g04380D			Bol030199	C04
BnMADS181	BnaC02g41870D	Brara.B03740.1.v1.3	A02	Bol017059	C06
BnMADS036	BnaA03g39820D	Brara.C04211.1.v1.3	A03	Bol036265	C09
BnMADS145	BnaAnng06660D	Brara.I00639.1.v1.3	A09
BnMADS253	BnaC07g49790D	Brara.B03396.1.v1.3	A02
		Brara.E03583.1.v1.3	A05
BnMADS035	BnaA03g39500D	Brara.B03724.1.v1.3	A02	Bol017090	C06
BnMADS180	BnaC02g41690D	Brara.C04181.1.v1.3	A03	Bol036252	C09
BnMADS108	BnaA09g05410D	Brara.H01136.1.v1.3	A08	Bol020634	C03
BnMADS273	BnaC09g04950D	Brara.I00628.1.v1.3	A09	Bol024572	C02
		Brara.C00336.1.v1.3	A03	Bol008824	C03
		Brara.I00679.1.v1.3	A09
BnMADS040	BnaA03g46780D	Brara.A01460.1.v1.3	A01	Bol042173	C06
BnMADS005	BnaA01g13920D	Brara.K01496.1.v1.3
BnMADS250	BnaC07g38990D
BnMADS161	BnaC01g04170D	Brara.A00398.1.v1.3	A01	Bol013644	C01
BnMADS002	BnaA01g02900D	Brara.G02398.1.v1.3	A07
BnMADS042	BnaA03g51000D	Brara.K00360.1.v1.3
BnMADS252	BnaC07g44870D
BnMADS219	BnaC05g33070D	Brara.A02863.1.v1.3	A01
BnMADS006	BnaA01g25970D	Brara.E02241.1.v1.3	A05
BnMADS167	BnaC01g33180D
BnMADS213	BnaC04g37430D	Brara.D01509.1.v1.3	A04	Bol044677	C08
		Brara.I04454.1.v1.3	A09
BnMADS023	BnaA02g34550D	Brara.B03931.1.v1.3	A02	Bol008027	C02
BnMADS075	BnaA06g23990D	Brara.F02378.1.v1.3	A06	Bol043693	C09
BnMADS193	BnaC03g49240D	Brara.J02336.1.v1.3	A10	Bol008758	C03
BnMADS009	BnaA01g33690D	Brara.A03781.1.v1.3	A01
BnMADS069	BnaA05g37450D	Brara.E03465.1.v1.3	A05
BnMADS223	BnaC05g47460D
BnMADS054	BnaA04g16540D	Brara.D01712.1.v1.3	A04	Bol033229	C04
BnMADS088	BnaA07g14000D	Brara.G01387.1.v1.3	A07
BnMADS201	BnaC04g15630D
BnMADS232	BnaC06g29980D	Brara.B01837.1.v1.3	A02	Bol028615	C02
BnMADS093	BnaA07g27710D	Brara.G02850.1.v1.3	A07	Bol023961	C07
BnMADS092	BnaA07g24360D	Brara.G02489.1.v1.3	A07	Bol017332	C07
		Brara.B03396.1.v1.3	A02	Bol032290	C09
		Brara.H02134.1.v1.3	A08	Bol024957	C03
		Brara.B03164.1.v1.3	A02	Bol043045	C06
		Brara.F03360.1.v1.3	A06
		Brara.F03067.1.v1.3	A06
		Brara.I00352.1.v1.3	A09
BnMADS086	BnaA07g10380D	Brara.G01034.1.v1.3	A07	Bol012341	C06
BnMADS119	BnaA09g30550D	Brara.I03303.1.v1.3	A09
BnMADS216	BnaC05g17880D
BnMADS050	BnaA04g06200D			Bol009964	C04
BnMADS208	BnaC04g29000D			Bol009950	C04
BnMADS207	BnaC04g28840D
BnMADS211	BnaC04g35060D			Bol044741	C08
BnMADS123	BnaA09g42480D
BnMADS254	BnaC07g49900D	Brara.A01004.1.v1.3	A01	Bol017012	C06
BnMADS037	BnaA03g40220D	Brara.B03768.1.v1.3	A02	Bol039528	C01
BnMADS146	BnaAnng06990D	Brara.C04259.1.v1.3	A03
		Brara.I00679.1.v1.3	A09
		Brara.A01539.1.v1.3	A01
BnMADS259	BnaC08g25160D	Brara.D00473.1.v1.3	A04	Bol025193	C08
BnMADS049	BnaA04g04160D	Brara.I03703.1.v1.3	A09
BnMADS205	BnaC04g26350D
BnMADS230	BnaC06g25500D	Brara.B01837.1.v1.3	A02	Bol028615	C02
BnMADS093	BnaA07g27710D	Brara.G02489.1.v1.3	A07	Bol024957	C03
BnMADS092	BnaA07g24360D	Brara.G02850.1.v1.3	A07	Bol017332	C07
		Brara.B03396.1.v1.3	A02	Bol023961	C07
		Brara.H02134.1.v1.3	A08	Bol032290	C09
		Brara.B03164.1.v1.3	A02	Bol043045	C06
		Brara.F03360.1.v1.3	A06
		Brara.F03067.1.v1.3	A06
		Brara.I00352.1.v1.3	A09
BnMADS099	BnaA08g02380D	Brara.H00279.1.v1.3	A08	Bol015619	C07
BnMADS227	BnaC06g02840D			Bol023443	C08
BnMADS255	BnaC08g02610D
BnMADS225	BnaC06g02000D	Brara.F00429.1.v1.3	A06	Bol044870	C07
BnMADS073	BnaA06g03800D
BnMADS270	BnaC08g38880D	Brara.I04929.1.v1.3	A09	Bol031566	C08
BnMADS129	BnaA09g56830D
BnMADS111	BnaA09g14020D	Brara.I01529.1.v1.3	A09	Bol014328	C03
BnMADS275	BnaC09g14350D
BnMADS138	BnaA10g29170D	Brara.J01270.1.v1.3	A10	Bol016846	C09
BnMADS279	BnaC09g34130D
BnMADS285	BnaC09g50730D	Brara.J02721.1.v1.3	A10
BnMADS137	BnaA10g25570D
BnMADS183	BnaC02g43420D	Brara.B03931.1.v1.3	A02	Bol043693	C09
BnMADS135	BnaA10g22080D	Brara.J02336.1.v1.3	A10	Bol008027	C02
		Brara.F02378.1.v1.3	A06	Bol008758	C03
BnMADS080	BnaA06g29690D	Brara.F02949.1.v1.3	A06
BnMADS246	BnaC07g27070D
BnMADS274	BnaC09g06190D	Brara.I00763.1.v1.3	A09
BnMADS125	BnaA09g52420D
BnMADS100
BnMADS256
BnMADS247	BnaC07g27290D	Brara.F02924.1.v1.3	A06
BnMADS079	BnaA06g29430D
BnMADS221	BnaC05g41400D	Brara.E02901.1.v1.3	A05	Bol010353	C05
BnMADS063	BnaA05g27290D
BnMADS226	BnaC06g02110D	Brara.F00416.1.v1.3	A06
BnMADS072	BnaA06g03660D
BnMADS218	BnaC05g22890D	Brara.I02855.1.v1.3	A09	Bol022502	C05
BnMADS117	BnaA09g26550D
BnMADS032	BnaA03g13630D	Brara.C01525.1.v1.3	A03
BnMADS192	BnaC03g16530D
BnMADS052	BnaA04g09950D	Brara.D01031.1.v1.3	A04
BnMADS209	BnaC04g32100D
BnMADS189	BnaC03g14130D	Brara.C01284.1.v1.3	A03	Bol027893	C03
BnMADS029	BnaA03g11270D
BnMADS056	BnaA05g02990D	Brara.E00310.1.v1.3	A05
BnMADS071	BnaA06g03400D	Brara.F00388.1.v1.3	A06
BnMADS174	BnaC02g26190D	Brara.B02665.1.v1.3	A02	Bol004579	C02
BnMADS017	BnaA02g21200D	Brara.I02250.1.v1.3	A09	Bol012087	C09
BnMADS187	BnaC03g06030D	Brara.C00582.1.v1.3	A03	Bol034251	C03
BnMADS026	BnaA03g04490D	Brara.J02063.1.v1.3	A10	Bol043407	C09
BnMADS120	BnaA09g34810D	Brara.I03772.1.v1.3	A09	Bol045393	C08
BnMADS260	BnaC08g25940D
BnMADS116	BnaA09g25390D	Brara.I02750.1.v1.3	A09
BnMADS289	BnaCnng10910D
BnMADS264	BnaC08g32990D	Brara.I04398.1.v1.3	A09	Bol044639	C08
BnMADS122	BnaA09g40550D
BnMADS070	BnaA06g01120D	Brara.F00136.1.v1.3	A06	Bol039135	C07
BnMADS098	BnaA07g38630D	Brara.G02556.1.v1.3	A07
BnMADS185	BnaC02g43730D	Brara.B03950.1.v1.3	A02	Bol008049	C02
BnMADS020	BnaA02g33230D	Brara.B03794.1.v1.3	A02	Bol017059	C06
BnMADS110	BnaA09g05900D	Brara.F02136.1.v1.3	A06	Bol029409	C09
		Brara.I00679.1.v1.3	A09
BnMADS269	BnaC08g37850D	Brara.G02360.1.v1.3	A07	Bol040070	C07
BnMADS124	BnaA09g45020D	Brara.G03122.1.v1.3	A07	Bol026349	C07
		Brara.I04835.1.v1.3	A09	Bol009782	C08
BnMADS132	BnaA10g13240D	Brara.B01043.1.v1.3	A02	Bol008953	C02
BnMADS014	BnaA02g06300D	Brara.B01028.1.v1.3	A02
		Brara.J01401.1.v1.3	A10
